# Supplementary material
Source: PubMed Central journal article supplement (PMC3428905)
Supplement: NIHMS49521-supplement-01.pdf [file NIHMS49521-supplement-01.pdf]

# Supplementary Figures

Figure S1

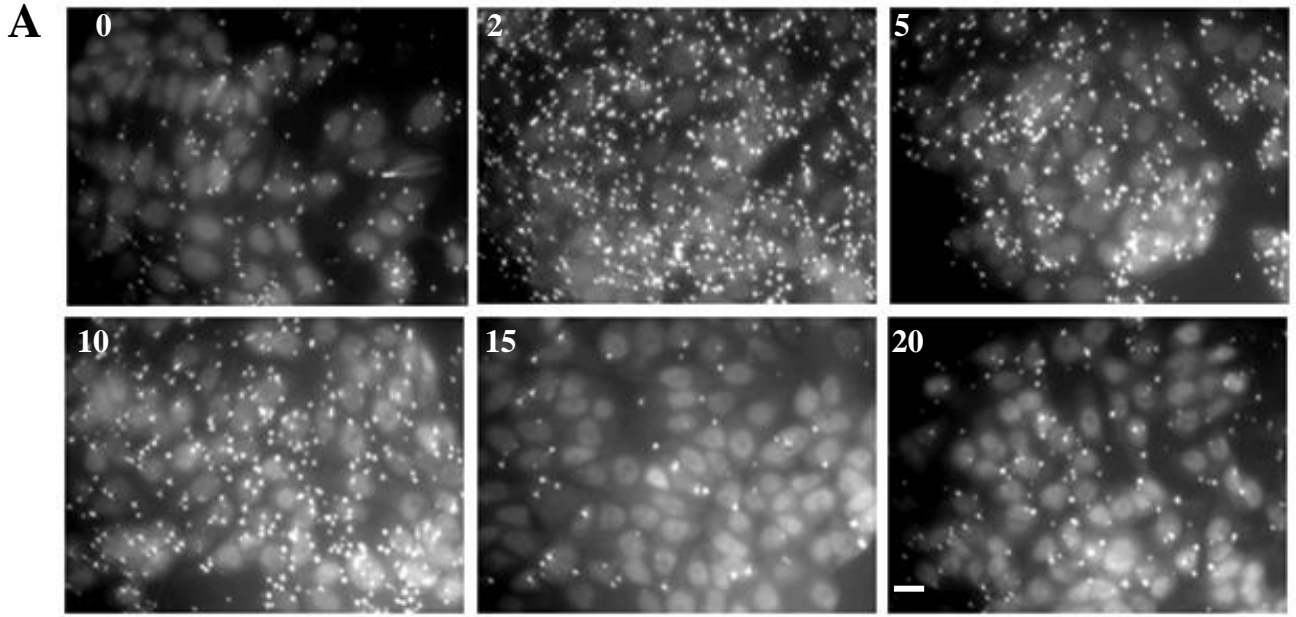

Treatment time (min)

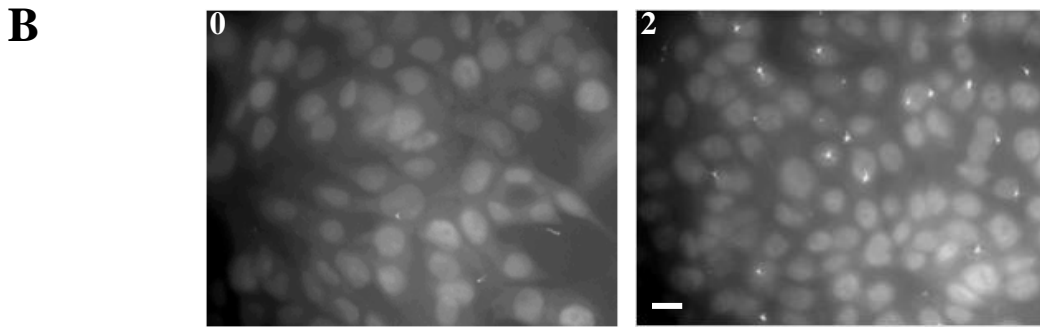

zinc treatment time (min)

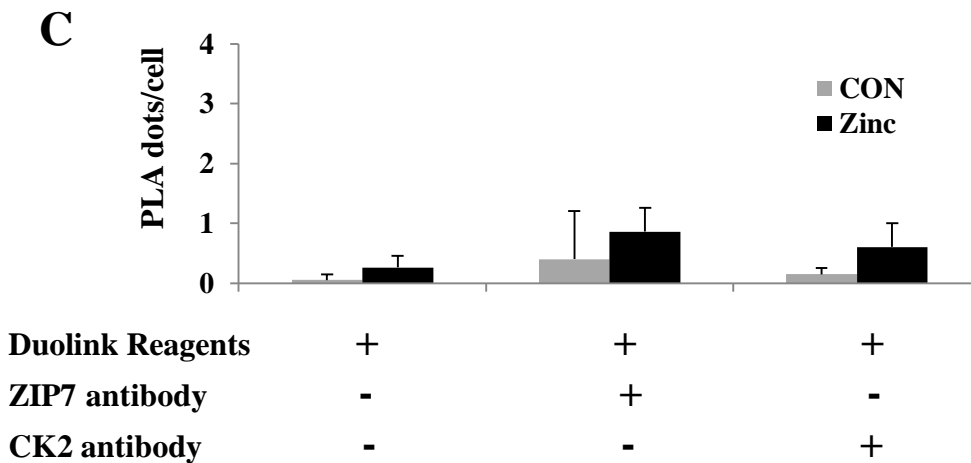

Proximity Ligation assay images and control results. (A) Representative figures of proximity ligation assay of ZIP7 and CK2 $\alpha$  stimulated with zinc in Fig 1E Scale bar = 10 $\mu$ m. (B) Representative figures of no antibody controls for proximity ligation assay in Figs 1E and 4B. Scale bar = 10 $\mu$ m. (C) Control results for proximity ligation assay lacking single and both antibodies and representative of n=3 experiments and expressed as mean  $\pm$ SD

**Figure S2****A**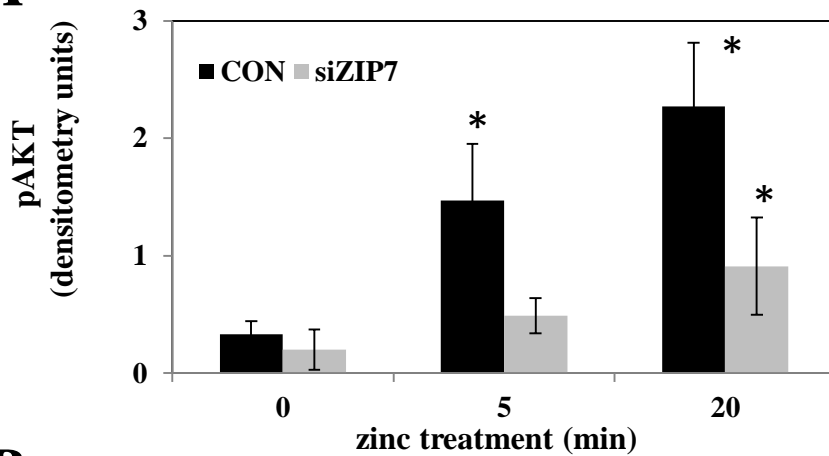**B**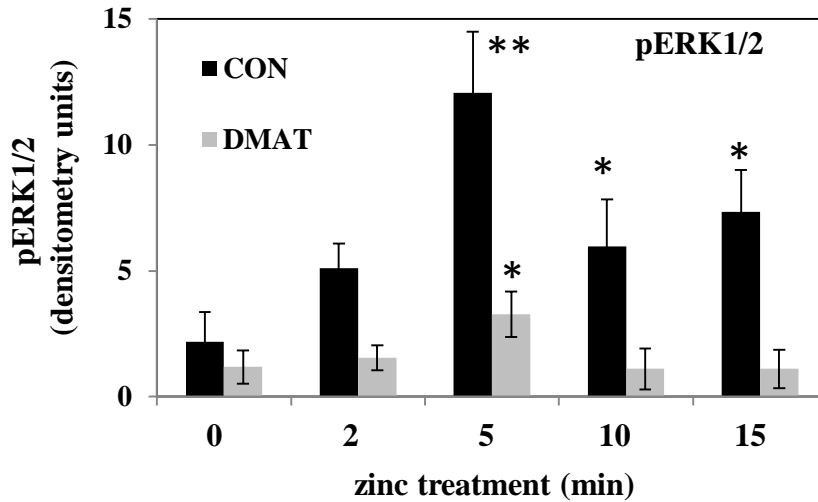**C**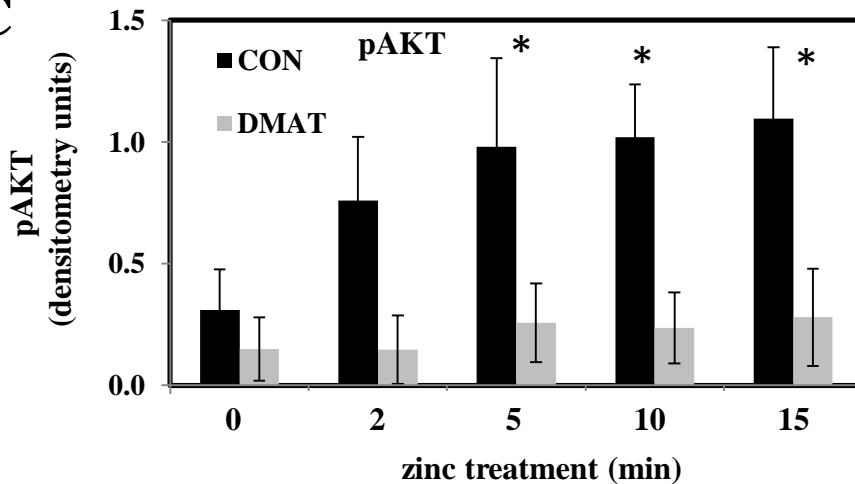

Densitometry analysis of pooled Western Blot results for Fig. 2. (A) Densitometry analysis of pooled Western Blot results from Fig 2D from n=3 experiments and expressed as mean  $\pm$ SD. \* denotes significance from time zero ( $P \leq 0.05$ ). (B) Densitometry analysis of pooled Western Blot results from Fig 2E from n=3 experiments and expressed as mean  $\pm$ SD. \* denotes significance from time zero ( $P \leq 0.05$ ) and \*\* denotes  $P \leq 0.001$ . (C) Densitometry analysis of pooled Western Blot results from Fig 2E from n=3 experiments and expressed as mean  $\pm$ SD. \* denotes significance from time zero ( $P \leq 0.05$ ).

**Figure S3**

**A**

**AGCTCA (Ser Ser) changed to GCCGCA (Ala Ala)**

**ZIP7  
wild-type**

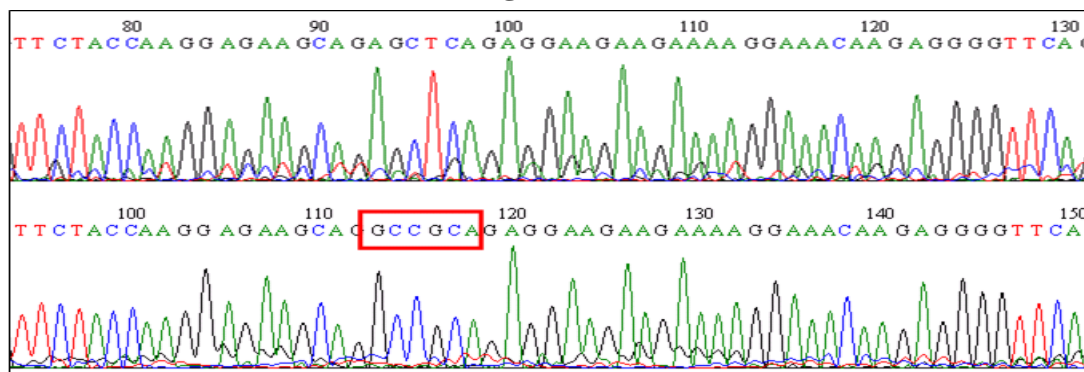

**B**

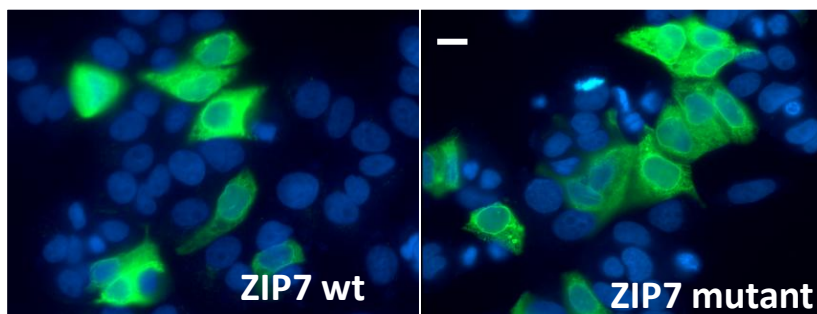

**C**

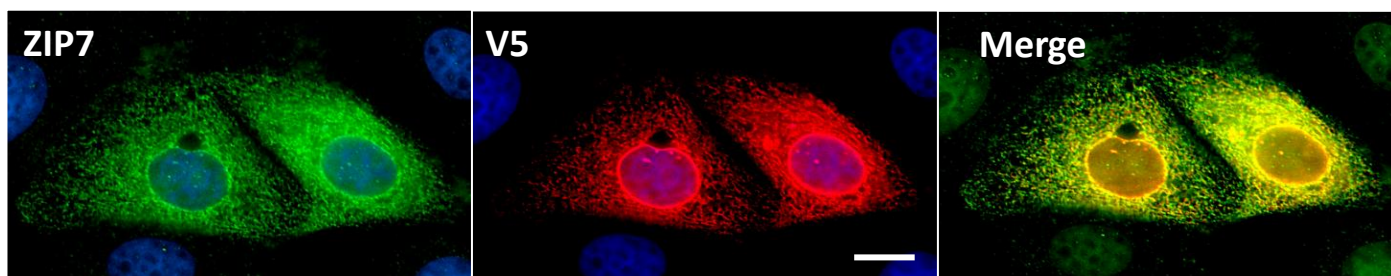

Characterisation of ZIP7 mutants and ZIP7 antibody.(A) Sequencing demonstration of S275 and S276 mutated to A275 and A276 in ZIP7 sequence. (B) MCF-7 cells transfected with either wild-type or mutant ZIP7 and probed with V5 antibody conjugated to Alexa-Fluor 488 (green). Nuclei stained blue with DAPI. Scale bar = 10µm. (C) MCF-7 cells transfected with wild-type ZIP7 and probed with ZIP7 antibody conjugated to Alexa-Fluor 488 (green), V5 antibody conjugated to Alexa-Fluor 594 (red) and nuclei stained blue with DAPI. Scale bar = 10µm.

**Figure S4**

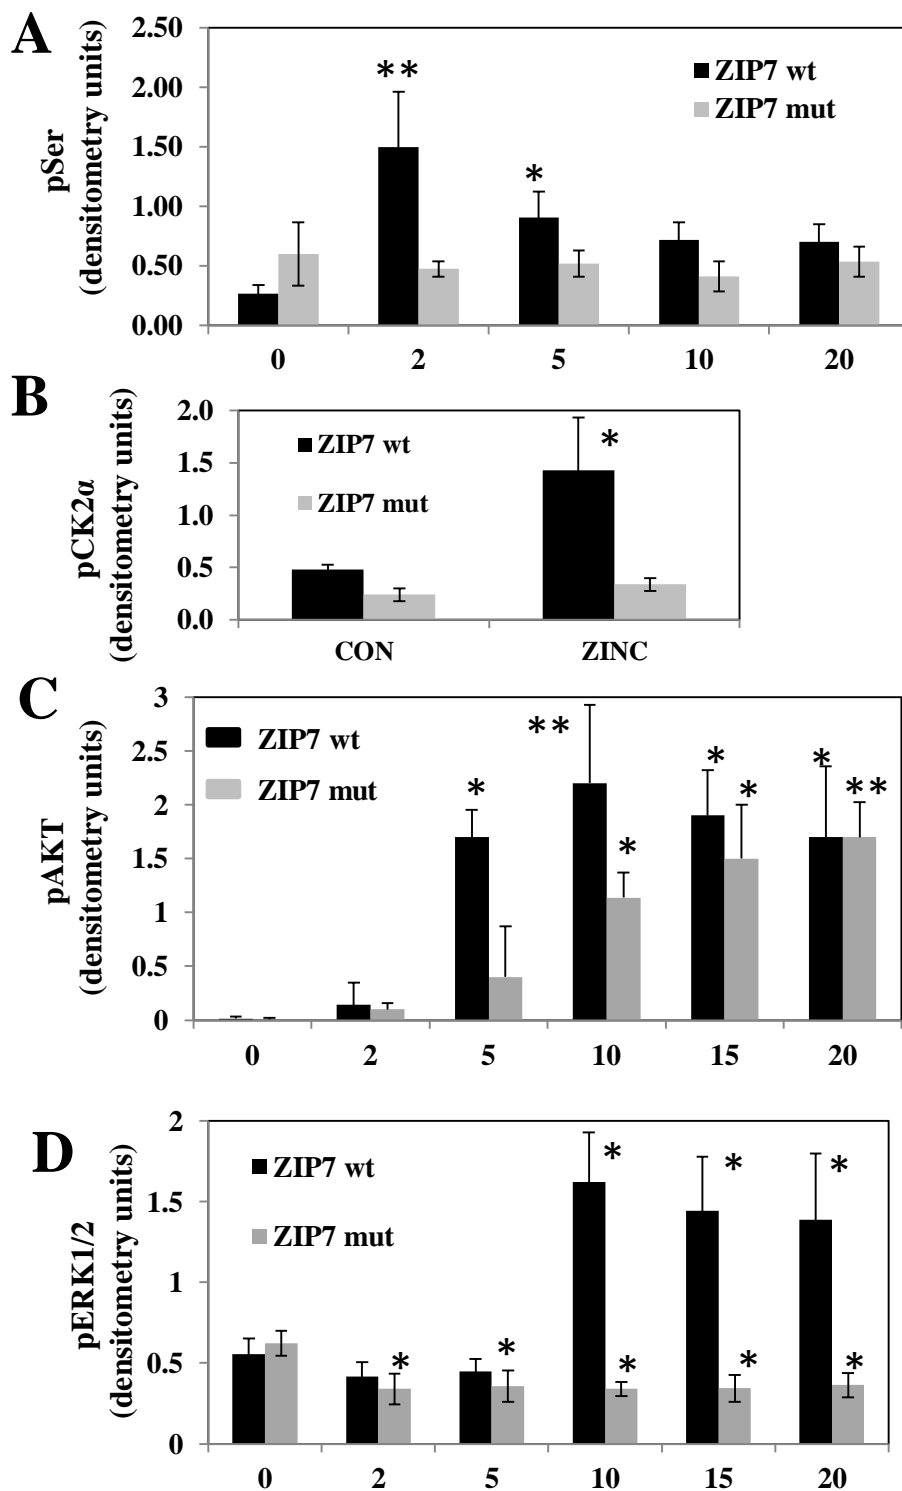

Densitometry analysis of pooled Western Blot results for Fig.3. (A) Densitometry analysis of pooled Western Blot results from Fig 3A from n=3 experiments and expressed as mean  $\pm$ SD. \* denotes significance from time zero ( $P \leq 0.05$ ) and \*\* denotes ( $P \leq 0.001$ ). (B) Densitometry analysis of pooled Western Blot results from Fig 3C from n=3 experiments and expressed as mean  $\pm$ SD. \* denotes significance from time zero ( $P \leq 0.05$ ). (C) Densitometry analysis of pooled Western Blot results from Fig 3E from n=3 experiments and expressed as mean  $\pm$ SD. \* denotes significance from time zero ( $P \leq 0.05$ ) and \*\* denotes ( $P \leq 0.001$ ). (D) Densitometry analysis of pooled Western Blot results from Fig 3E from n=3 experiments and expressed as mean  $\pm$ SD. \* denotes significance from time zero ( $P \leq 0.05$ ).

# Figure S5

**A**

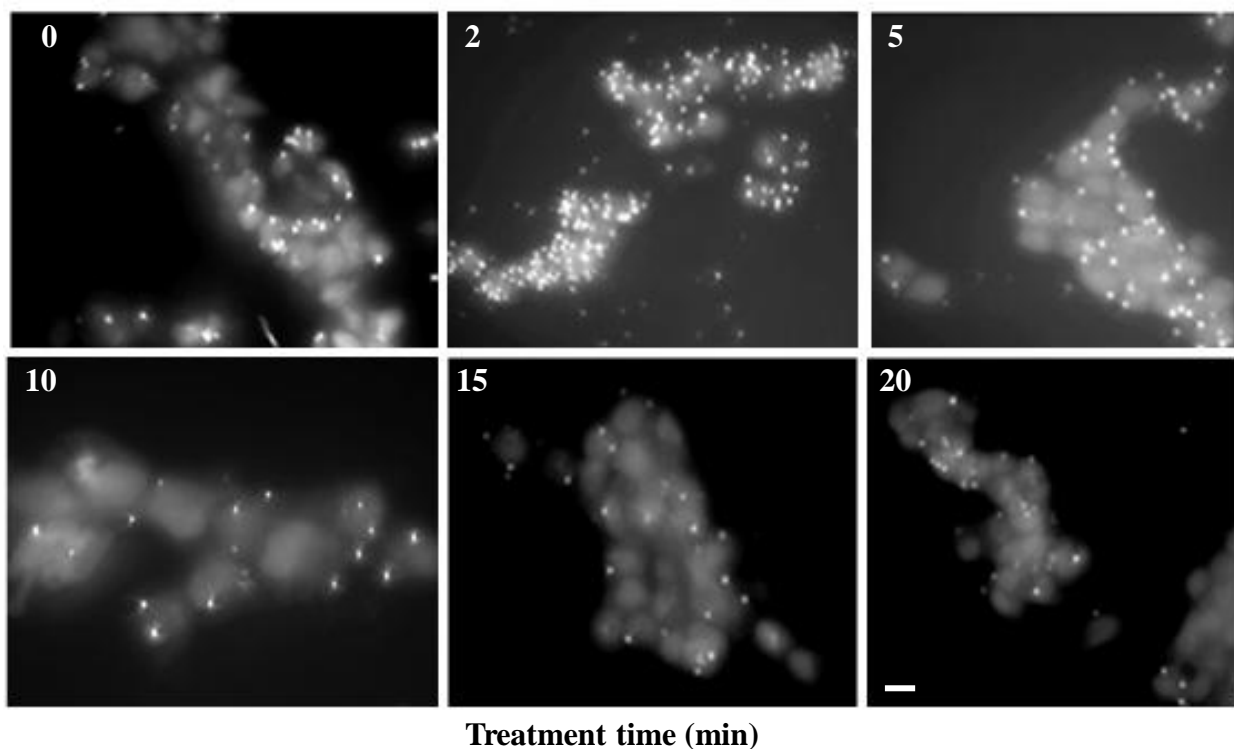

**B**

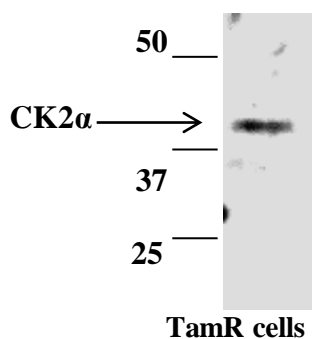

Proximity ligation assay images and CK2α antibody control. (A) Representative figures of proximity ligation assay of ZIP7 and CK2α stimulated with EGF and ionomycin in Fig 4B Scale bar = 10μm. (B) CK2α antibody recognises a single band on Western Blot of appropriate size in TamR cells
